# Supplementary material for: Fishery-based adaption to climate change: the case of migratory species flathead grey mullet (Mugil cephalus L.) in Taiwan Strait, Northwestern Pacific
Source: PeerJ. 2023 Aug 30;11:e15788. doi: 10.7717/peerj.15788 (PMC10474836; doi:10.7717/peerj.15788)
Supplement: Supplemental Information 2 [file peerj-11-15788-s002.xlsx]

## Sheet: data
Area	No	Basic information					The 5-point scale questions												The opinion question
		Gender	Occupation	Engage in the grey mullet fishery	Fishing gear	The tonnage of vessel	A. Economic aspect (5-point scale)					B. Environmental aspect (5-point scale)			C. Operation aspect (5-point scale)				1. In your opinion, what are the most important issues in the current Taiwanese grey mullet fishery	2. For the aforementioned issues in the grey mullet industry, do you have any solution or suggestion?	3. What do you think about sustainable development for grey mullet fisheries?
		1. Male 2. Female	1. Fishermen 2. Others	1. No 2.Yes, from______to_______	1. Purse seine 2. Trawl 3. Gillnet 4. Others	1. Unpowered sampan (CTX) 2. Unpowered fishing raft (CTY) 3. Powered sampan (CTS) 4. Powered fishing raft (CTR) 5. Under 10 tons (CT0-1) 6. 10-20 tons (CT2) 7. 20-50 tons (CT3) 8. 50 tons or higher (CT4 or higher) 9. Others	A1 Increasing operation cost	A2 Reducing operation scale	A3 Changes in the main catch as body size	A4 Reducing the fish production	A5 Reducing the overall benefit	B1 Increasing seawater temperature	B2 Variation in oceanic current	B3 Increasing the frequency of the extreme weather	C1 Variation in the fishing ground	C2 Variation in operation time as fishing season	C3 Increasing the difficulty for fishing vessel to operation	C4 Variation in the vessel size
Yunlin	P1	1	1	1	2	4	4	4		5	4	4	4	4	4	4	4	4	Climate variability	No idea	Not optimistic
Yunlin	P2	2		2, 1993-2006	4	9	4	4	3	2	5	4	4	4	5	5	3	4	Pricing issue	The unstable climatic phenomena result in an increasing trend in the morality of grey mullet	The price is unstable, and the market price is not consistent
Yunlin	P3	1	1	1	2	4	4	4	4	4	4	4	4	4	4	4	4	4	Climate variability	No idea	Not optimistic
Yunlin	P4	1	1	1	4	4	4	4	4	4	4	4	4	4	4	4	4	4	Climate variability	No idea	Not optimistic
Yunlin	P5	1	1	1	2	4	4	4	4	4	4	4	4	4	4	4	4	4	Climate variability	No idea	Not optimistic
Yunlin	P6	1	1	1	4	4	4	4	4	4	4	4	4	4	4	4	4	4	Climate variability	No idea	Not optimistic
Yunlin	P7	1	1	1	2	4	4	4	4	4	4	4	4	4	4	4	4	4	Climate variability	No idea	Not optimistic
Yunlin	P8	1	1	2, 1971-2021	2	4	4	4	4	4	4	4	4	4	4	4	4	4	Climate variability	No idea	Not optimistic
Yunlin	P9	1	1	1	4	4	4	4	4	4	4	4	4	4	4	4	4	4	Climate variability	No idea	Not optimistic
Yilan	P1	1	1	2, 1961-now	4	7	5	3	4	3	3	4	3	3	4	3	3	3	The larvae of the grey mullet	No idea	Not optimistic
Chiayi	P1	1	1	1	2	4&5 (2 vessels)	4	4	2	4	4	3	3	3	3	3	3	3	Climate change varies the spawning of the grey mullet	No idea	No idea
Chiayi	P2	1	1	1	2	9	5	3	5	5	4	4	4	5	3	3	3	3	Climate variability and the competition with chinese grey mullet fishery	Improvement in mullet aquacultural techniques	No idea
Chiayi	P3	1	1	2, 2007-now	4	9	4	4	4	5	4	5	4	5					An increasing trend in seawater temperature and extreme weather	No idea	No idea
Chiayi	P4	1	1	2, 1991-now	2	4	5	5	4	5	5	5	5	5	4	5	5	3	The grey mullet catch has been decreasing	No idea	No idea
Chiayi	P5	1	1	2, 2010-no2	4	1	5	5	3	5	5	5	4	5	3	3	3	3	Climate change	No idea	Not optimistic
Chiayi	P6	1	1	2, 1981-now	2	4	5	4	5	5	5	5	3	4	3	3	4	3	Grey mullet fishery technique	No idea	Not optimistic
Chiayi	P7	1	1	1	2	3&5 (2 vessels)	5	4	3	5	4	4	3	3	3	3	3	3	A decrease in the grey mullet production	No idea	No idea
Chiayi	P8	1	1	1	2	4&5 (2 vessels)	4	4	3	4	4	4	3	4	2	2	2	3	A decrease in the grey mullet production and the competition with chinese fishermen	Government should pay more attention on the related issues and strongly support fisherment as allowance, etc.	No idea
Chiayi	P9	1	1	1	2	4&5 (2 vessels)	4	4	2	4	4	4	3	3	3	3	3	3	The grey mullet catches have been decreasing in combination with an increasing trend in seawater temperature	No idea	No idea
Chiayi	P10	1	1	1	2	4&5 (2 vessels)	5	4	3	4	4	3	4	3	3	3	3	3	No idea	No idea	No idea
Chiayi	P11	1	1	1	2	3&5 (2 vessels)	5	3	2	5	4	4	3	3	2	2	3	4	The grey mullet production has been declining and caused by climate change and the impacts of industrial development	No idea	No idea
Kaohsiung	P1	1	1	1	4	9	5	5	4	5	5	5	5	5	4	3	4	5	No idea	No idea	No idea
Kaohsiung	P2	2	1	1	4	9	4	4	5	5	5	5	4	5	3	4	4	4	No idea	No idea	No idea
Kaohsiung	P3	1	1	1	4	3	4	4	4	4	4	4	4	3	3	3	4	4	No idea	No idea	No idea
Kaohsiung	P4	1	1	2, 1981-now	2	9	5	5	4	4	4	4	4	4	3	3	2	5	A decreasing trend in the grey mullet catches in combination with the decrease of fishermen population	Improve the aquacultural techniques of the grey mullet	No idea
Kaohsiung	P5	2	1	1	1	9	4	4	3	3	4	3	3	3	3	3	3	3	No idea	No idea	No idea
Kaohsiung	P6	1	1	1	1	9	4	3	3	3	3	3	3	3	3	3	4	4	No idea	No idea	No idea
Kaohsiung	P7	2	1	1	4	1	5	4	4	4	4	4	4	4	3	2	4	4	No idea	No idea	No idea
Kaohsiung	P8	1	1	1	2	6	4	4	5	5	5	3	3	3	3	3	3	3	No idea	No idea	No idea
Kaohsiung	P9	1	1	1	2	6	4	4	4	4	4	4	4	4	4	4	4	4	No idea	No idea	No idea
Kaohsiung	P10	2	1	1	1	4	5	5	4	4	4	4	4	4	3	3	1	4	No idea	No idea	No idea
Kaohsiung	P11	1	1	1	1	8	4	3	4	5	4	5	3	3	4	4	4	3	No idea	No idea	No idea
Taichung	P1	1	1	1	4	9	4	3	3	4	4	4	3	4	4	2	3	4	No idea	No idea	No idea
Taichung	P2	1	1	1	4	6	4	4	4	5	4	4	3	4	4	3	3	4	Because of climate change, it varies the appearance of the grey mullet towards the worse direction	Because this is a natural phenomenon, it is impossible to resolve this issue	No idea
Taichung	P3	1	1	1	4	6	4	4		4	4	4	3	3	4	3	3	4	No idea	No idea	No idea
Taichung	P4	1	1	1	4	6	5	5	5	5	5	5	3	3	5	3	5	5	No idea	No idea	No idea
Taichung	P5	1	1	1	4	6	4	4	4	4	4	4	3	3	4	4	4	4	No idea	No idea	No idea
Taichung	P1	1	1	2, 1981-now	2	7	4	3	4	4	4	4	3	4	3	2	3	3	Seawater temperature increase	Because this is a natural phenomenon, there is no sollution	Restrict an act of catching grey mullet
Fisheries Research Institute	P1	1	2. Scholar				5	3	3	4	4	5	3	3	4	3	3	3	No idea	No idea	No idea
Fisheries Research Institute	P2	1	2. Scholar				5	4	4	5	4	4	3	4	4	4	2	3	1. Human factor: The migration of the target species is from mainland China southward the coastal waters of Taiwan, yet during this period they move to the waters off Taiwan, they are not entirely mature. Moreover, there is the competition with Chinese fishermen making Taiwan mullet fishery more and more difficult in addition to the lower economic value of the grey mullet roe. 2. Environmental fa…	Using intelligent farming methods to create the most suitable environment for mullet farming, improve the quality of mullet, reduce the cost of farming.	Using intelligent aquacultural methods and other techniques to improve the quality of mullet, then replace the overfishing of wild mullet.
Fisheries Research Institute	P3	1	2. Scholar				3	4	4	3	3	5	4	3	5	3	3	3	The annual changes in mullet fishing grounds and resources have caused uncertainty in the grey mullet fishery.	Developing the accurate prediction of the grey mullet and oceanographic variables could provide fishermen the potential fishing ground and reduce operation cost	The grey mullet production should be managed and developed towards the sustainability
Fisheries Research Institute	P4	2	2. Scholar				2	4	3	1	2	4	4	3	4	3	3	3	The northward migration of the grey mullet fishing grounds caused by climate change resulted in the reduction of the large-scale grey mullet fishing vessels. In addition, variation in location of fishing grounds is also affected by seawater temperature and the competition from mainland china. As a result, it is not easy to conserve and manage the grey mullet resources.	It is necessary to conduct international cooperation with the mainland China and discuss joint management method to monitor the annual changes in mullet resources.	It is necessary to monitor the size of the mullet continuously and observe whether there are warning signs of resource reduction in combination with investigation on the relationship between the marine environment and the mullet fishery change. In addition, establishing the cooperation with the mainland China will reduce the pressure on mullet resources and jointly determine the optimal productio…
Government personnel	P5	1	2. Government personnel				4	4	3	5	5	5	4	4	5	4	2	2	The grey mullet production has been decreasing and caused by the increasing trend in seawater temperature in addition to the phenomena of overfishing and competition with mainland China, leading to the dramatical decrease in the catches of the target species	It is necessary to improve the grey mullet aquacultural techniques, yet mullet farming will also be affected by climate change. If the climate is warmer in winter, the mullet roe will not be mature enough, the skin will be greasy, the smell will be strong; consequently, it is difficult to get the higher price for the mullet products. With the continuous improvement of farming technology, the outp…	The grey mullet products are famous and attractive for a huge part of customers, yet the target species' production has been in a decreasing trend as overfishing, that should be controlled. Moreover, the quality of the aquacultural grey mullet product also influenced by oceanographic variables should be eliminated by the new modern techniques. Additionally, government also needs to encourage and …
Government personnel	P6	1	2. Government personnel				4	4	4	4	4	4		4	4	4	3	3	1. Facing the competition with Chinese fishery and marine pollution caused by the industrial development in mainland China 2. The gradually increasing trend in seawater temperature and frequency of the extreme weather	A. Establish the grey mullet resource estimation and the long-term abundance monitoring B. Renew and re-evaluate MSY and MEY for the target species resources C. Establish and manage products made from the grey mullet	A. Establish the standard for the mullet-related products B. Improve the stakeholders' understanding and the education-associated works
Government personnel	P7	1	2. Government personnel				4	3	4	5	4	4	3	4	4	4	4		Mainly facing competition from the mainland China	Negotiate with the mainland China about the related issues or refuse to purchase the grey mullet products made from China	Support sustainable development goal through good and practical management behavior
Fisheries Research Institute	P8	1	2. Scholar				4	4	4	4	3	5	4	4	5	3	4	3	Changes in fishing grounds and annual variation in resources have resulted in uncertainty and shrinkage of the mullet fishert.	Provide the accurately oceanographic data and timely prediction for fishermen to refer and reduce the time to find fishing grounds as well as energy saving	The grey mullet catch should be managed and limited to reduce the chance of being caught and develop towards the optimum catch amount.
Fisheries Research Institute	P9	1	2. Scholar				4	5	5	5	5	5	3	3	5	5	4	3	Area of fishing grounds increases and leads to uncertainty on catch quality and quantity increases.	Providing the immediate fishing ground maps to fishermen, reducing the operation cost.	It is more important to strengthen resource management besides the impact of changes in fishing grounds. There should also be a platform for industry, government, academia and research to communicate and exchange information.
Fisheries Research Institute	P10	1	2. Scholar				4	2	3	3	2	4	3	4	4	4	4	3	Insufficient grasp of the environment, unable to predict fishing season	Listen to the voices of fishermen and confirm the problems. Additionally, government should intends to promote this fishery researches	Government should remove allowance policy for fishermen and improve the stakeholders' sustainability-related understanding
Fisheries Research Institute	P11	2	2. Scholar				4	4	4	4	2	5	4	5	4	4	3	5	Increased demand for mullet roe, etc. leads to overfishing/decrease of mullet due to environmental changes	Restricting the target species production and guiding fishermen to have the concept of sustainable fishery in addition to improvement of habitat prediction	Education
Fisheries Research Institute	P12	1	2. Scholar				3	3	4	5	2	3	4	5	3	3	3	3	The sale of mullet roe is too high, and the breeding industry is not prosperous	Increasing funding for research	Technology transfer
Fisheries Research Institute	P13	1	2. Scholar				4	5	5	4	4	5	3	4	4	4	4	3	Climate change leads to uncertainty on the grey mullet fishery	Increasing relevant research and communicating more with stakeholders	Ensuring the impacts of ocean pollution on mullet fishery
Fisheries Research Institute	P14	2	2. Scholar				4	2	4	4	4	4	4	4	4	3	4	4	The fishing season is unstable, the operating period and time of fishing vessels are lengthened, and CPUE decreases	Standardizing the scope of fishing grounds and vessels, and predicting fishing season by integration of the related information	Unstable fish populations resulted from climate change often require effective management of fisheries practices
Government personnel	P15	1	2. Government personnel				4	4	4	4	4	4	4	4	4	2	2	2	Due to the impact of the environment, there is a large gap in annual catches, resulting in high risks in fishery operations	Fish catch varies greatly from year to year, and it is speculated that the reason is related to climate changes. It is suggested to establish the long-term observation program to establish the relationship between oceanographic variables and the target species and a forecasting mechanism for the potential fishing ground	After the forecasting mechanism is established, it should be jointly managed with adjust areas to maintain resource sustainability.
